# Supplementary material for: Long-term stability studies of a semiconductor photoelectrode in three-electrode configuration
Source: Royal Society of Chemistry journal article supplement (doi:10.1039/c9ta09926c), 2019-01-01
Supplement: c9ta09926c1.pdf [file c9ta09926c1.pdf]

# Long-Term Stability Studies of a Semiconductor Photoelectrode in Three-Electrode Configuration

Srinivas Vanka<sup>1,2</sup>, Kai Sun<sup>3</sup>, Guosong Zeng<sup>4</sup>, Tuan Anh Pham<sup>5</sup>, Francesca Maria Toma<sup>4</sup>, Tadashi  
Ogitsu<sup>5</sup> and Zetian Mi<sup>1\*</sup>

<sup>1</sup> *Department of Electrical Engineering and Computer Science, University of Michigan, Ann  
Arbor, 1301 Beal Avenue, Ann Arbor, MI 48109, USA*

<sup>2</sup> *Department of Electrical and Computer Engineering, McGill University, 3480 University  
Street, Montreal, Quebec, H3A 0E9, Canada*

<sup>3</sup> *Department of Materials Science and Engineering, University of Michigan, 2300 Hayward  
Street, Ann Arbor, MI 48109, USA*

<sup>4</sup> *Lawrence Berkeley National Laboratory, Chemical Sciences Division, 1 Cyclotron Road,  
Berkeley, CA 94720, USA*

<sup>5</sup> *Lawrence Livermore National Laboratory, Quantum Simulations Group, 7000 East Avenue, L-  
413, Livermore, CA 94550, USA*

\* *Corresponding author E-mail: ztmi@umich.edu; Phone: +1 734 764 3963*

## Experimental Section

**MBE growth of  $n^+$ -GaN nanowires on  $n^+$ - $p$  Si.** The nanowires are formed spontaneously under nitrogen-rich conditions without using any external metal catalyst, which lead to N-terminated surfaces, not only for their top  $c$ -plane but also for the surrounding nonpolar surfaces<sup>1</sup>. The growth conditions included a substrate temperature  $\sim 730$  °C, Ga beam equivalent pressure of  $6 \times 10^{-8}$  torr, Ge cell ( $n$ -type dopant) at 1050 °C, nitrogen flow rate of 1 standard cubic centimeter per minute, plasma forward power of 350 W, and growth duration of 2 h<sup>2-4</sup>.

**Photoelectrode Preparation.** The  $n^+$ -GaN nanowires/ $n^+$ - $p$  Si photocathode was first diced into pieces of with areas between 0.1 and 0.25 cm<sup>2</sup> using a diamond pen. Ohmic contact to the photocathode was made by lightly smearing Ga-In eutectic paste on the backside of the sample, which was subsequently connected to a Cu-wire by using silver paste. The electrical connection was then encapsulated by using epoxy which was spread on a glass slide and covered the backside and edge of the sample to minimize any leakage current.

**Photo-deposition of Pt co-catalyst nanoparticles.** The prepared photoelectrode was mounted on a glass slide and placed in the bottom of a Pyrex chamber with a quartz window. Next, 10  $\mu$ L of 0.2 M Chloroplatinic acid hydrate (99.9%, Sigma Aldrich) was used as Pt precursor, and 11 mL of CH<sub>3</sub>OH (i.e., a hole scavenger) and 55 mL of Milli-Q water were poured into the Pyrex chamber. The chamber was subsequently evacuated using a vacuum pump for 10 min. Then the sample was irradiated using a 300 W xenon lamp (PerkinElmer, PE300BF) for 30 min for the photodeposition of Pt co-catalyst nanoparticles.

**Regeneration of Pt Co-catalyst Nanoparticles.** At the end of each cycle, the sample was mounted again on a glass slide for the photo-deposition of Pt co-catalyst nanoparticles. It is essential to avoid any unnecessary mechanical stress on the samples in this process. The glass slide was placed in Pyrex chamber, and 5-10  $\mu\text{L}$  of 0.2 M Chloroplatinic acid hydrate (99.9%, Sigma Aldrich), 11 mL of  $\text{CH}_3\text{OH}$  and 55 mL of Milli-Q water were added to the Pyrex chamber. The chamber was evacuated using a vacuum pump for 10 min. Then the sample was irradiated using a 300 W xenon lamp for 20-25 min. After the redeposition, the sample was dried with  $\text{N}_2$  gun and ready for the next run.

**Photoelectrochemical reaction.** PEC experiments, including  $J$ - $V$  characterization and stability measurements, were conducted in 0.5 M  $\text{H}_2\text{SO}_4$  solution in a three-electrode configuration using Pt-decorated GaN/Si, silver chloride electrode (Ag/AgCl), and Pt wire as the working, reference, and counter electrode, respectively. A solar simulator (Newport Oriel) with an AM 1.5G filter was used as the light source, and the light intensity was calibrated to be 100  $\text{mW}/\text{cm}^2$  for all the experiments. Considering the long-term stability experiments, it is essential to regularly calibrate the intensity of solar simulator, which was done by using Newport-Power-818-ST-UV power meter. The conversion of the Ag/AgCl reference potential to a reversible hydrogen electrode (RHE) is calculated using Eqn. 1,

$$E_{(RHE)} = E_{Ag/AgCl} + E_{Ag/AgCl}^o + 0.059 \times pH \quad (1)$$

where  $E_{Ag/AgCl}^o$  is 0.197 V, and pH of the electrolyte is nearly zero.

The ABPE of the photocathode was derived using Eqn. 2<sup>5</sup>,

$$ABPE (\%) = \left[ \frac{|J_{ph} (\text{mA} \cdot \text{cm}^{-2})| \times (V_{app} - V_{o,cathode})}{P_{tot} (\text{mW} \cdot \text{cm}^{-2})} \right] \times 100 \quad (2)$$

where  $V_{o,cathode} = 0 V$  vs RHE,  $J_{ph}$  is photocurrent density measured under applied bias ( $V_{app}$ ) vs. RHE and  $P_{tot}$  is AM 1.5G one sun illumination ( $100 \text{ mW/cm}^2$ ).

The Faraday efficiency ( $\eta_{(Faraday)}$ ) for stability  $\text{H}_2$  evolution measurements were calculated using Eqn. 3<sup>2, 5, 6</sup>, which describes the ratio of average experimental (red dots) and theoretically calculated (black dots)  $\text{H}_2$  production.

$$\eta_{(Faraday)}(\%) = \frac{2 \times n_{\text{H}_2}(t=T_0)[\text{mol}] \times F}{\int_0^{T_0} I [\text{A}] \cdot dt [\text{s}]} \times 100 \quad (3)$$

where  $I$  is the measured photocurrent,  $F$  is Faradaic constant ( $96485 \text{ C/mol}$ ) and  $n_{\text{H}_2}$  is the total amount of  $\text{H}_2$  produced for a time duration  $T_0$ .  $\text{H}_2$  was detected by gas chromatograph (GC, Shimadzu GC-8A) equipped with a thermal conducting detector (TCD).

**SEM and TEM Characterization.** SEM images are taken using Hitachi SU8000 at an accelerating voltage of 10 kV. High angle annular dark field (HAADF)-STEM images were collected using a JEOL 2100F microscope with STEM aberration corrector operated at 200 kV. The TEM samples were prepared by scratching the nanowire surface with a tweezer/glass-slide and then mechanically transferring the GaN nanowires on the TEM copper grid.

**AFM measurements.** Nanometer scale lateral resolution scanning of a  $1 \times 1 \mu\text{m}^2$  area before and after 10 h chronoamperometry testing were acquired by a commercial AFM system (Bruker Dimension ICON). A silicon tip with on nitride cantilever with nominal spring constant of  $0.4 \text{ N/m}$  was selected for this measurement. The surface mapping was obtained by Peak Force mode using low deflection setpoint and scan rate was set to  $0.5 \text{ Hz}$  to minimize the artifacts due to drifting, disturbance, etc.

**ICP-MS measurements.** ICP-MS measurements were conducted using a Perkin-Elmer Nexion 2000 ICP-MS machine. The electrolyte samples were collected at the end of a 24 h dark run, 1<sup>st</sup>, 46<sup>th</sup>, 96<sup>th</sup>, and 140<sup>th</sup> regeneration cycle. The calibrations were done using standard Ga and Pt (1000 $\mu$ g/mL) from Ultra Scientific with bismuth as internal standard.

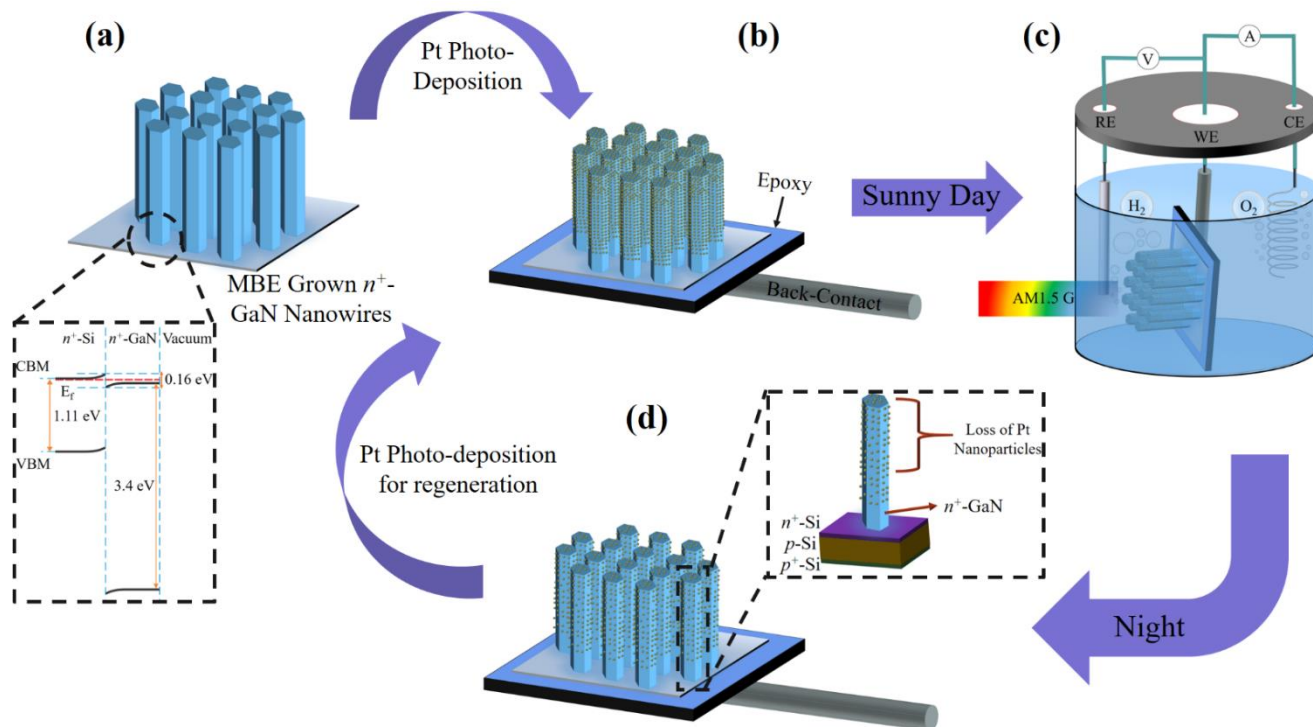

**Scheme S1.** Pt catalyst regeneration process during stability experiment using (a) MBE grown  $n^+$ -GaN nanowires on  $n^+$ - $p$  Si photocathode. The band-diagram at the bottom shows the unique advantage of small conduction band offset between  $n^+$ -GaN and  $n^+$ -Si which allows efficient charge carrier extraction<sup>2</sup>. This photocathode first undergoes (b) Pt photo-deposition after electrode preparation, then followed by (c) the start of three-electrode stability experiment inside the glass chamber during a “sunny” day (AM 1.5G one-sun illumination). (d) After this run, the loss of Pt nanoparticles can be replenished, during “night” time, to Scheme 1(b) by doing Pt photo-deposition on the photocathode. Then the next cycle starts as shown in Scheme 1(c). This cycle consisting of stability run for 24 h, and subsequent Pt catalyst regeneration has been repeated more than 100 times throughout 3000 h.

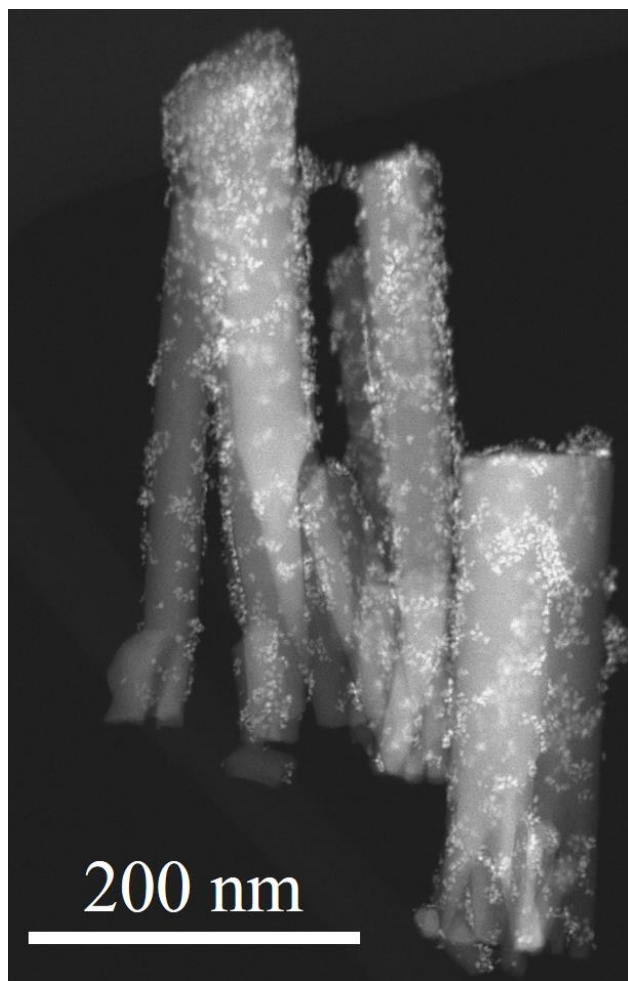

**Figure S1.** STEM of Pt-decorated  $n^+$ -GaN nanowires/ $n^+$ - $p$  Si photocathode before the start of long-term stability experiments.

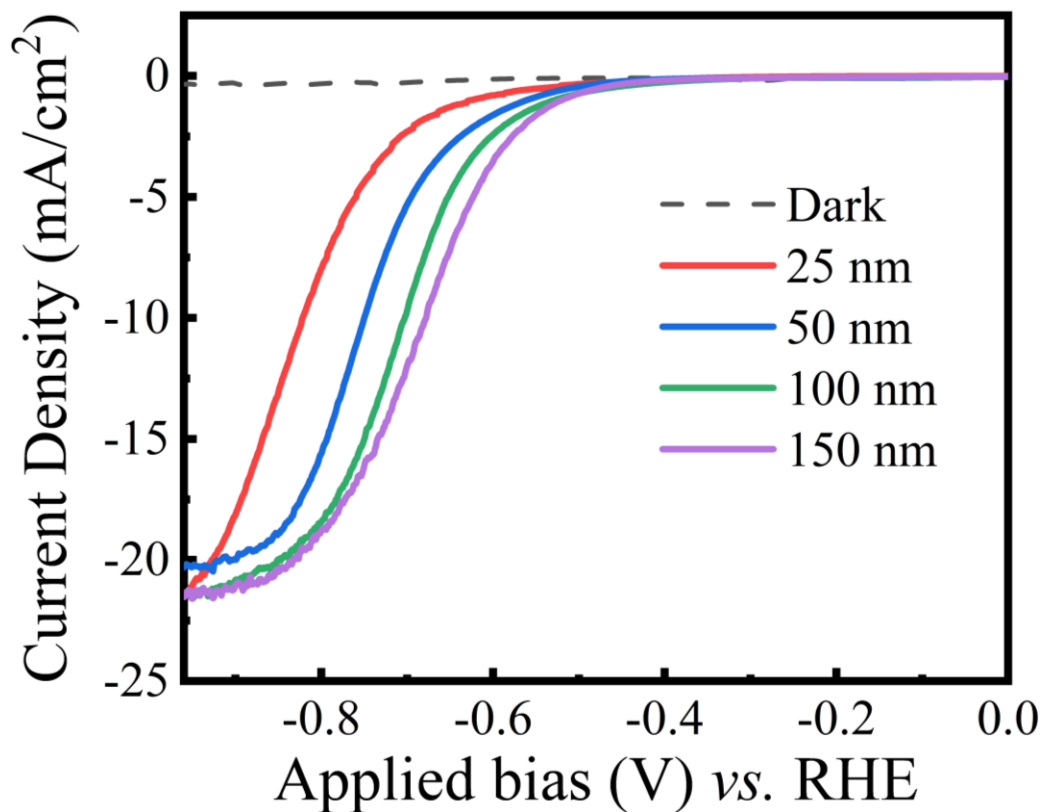

**Figure S2.** Comparison of  $J$ - $V$  curves for planar  $n^+$ -GaN protected  $n^+$ - $p$  Si (without Pt nanoparticles) with thicknesses: 25 nm (red color), 50 nm (blue color), 100 nm (green color) and 150 nm (pink color) under AM 1.5G one-sun illumination and dark (black color) conditions. The maximum saturation  $J$  for all the thicknesses at  $\sim -1$  V vs. RHE is  $\sim 20$ - $22$  mA/cm<sup>2</sup>, which is consistent with the near-perfect conduction band-alignment between  $n^+$ -GaN and Si (as shown in Figure 1(d)).



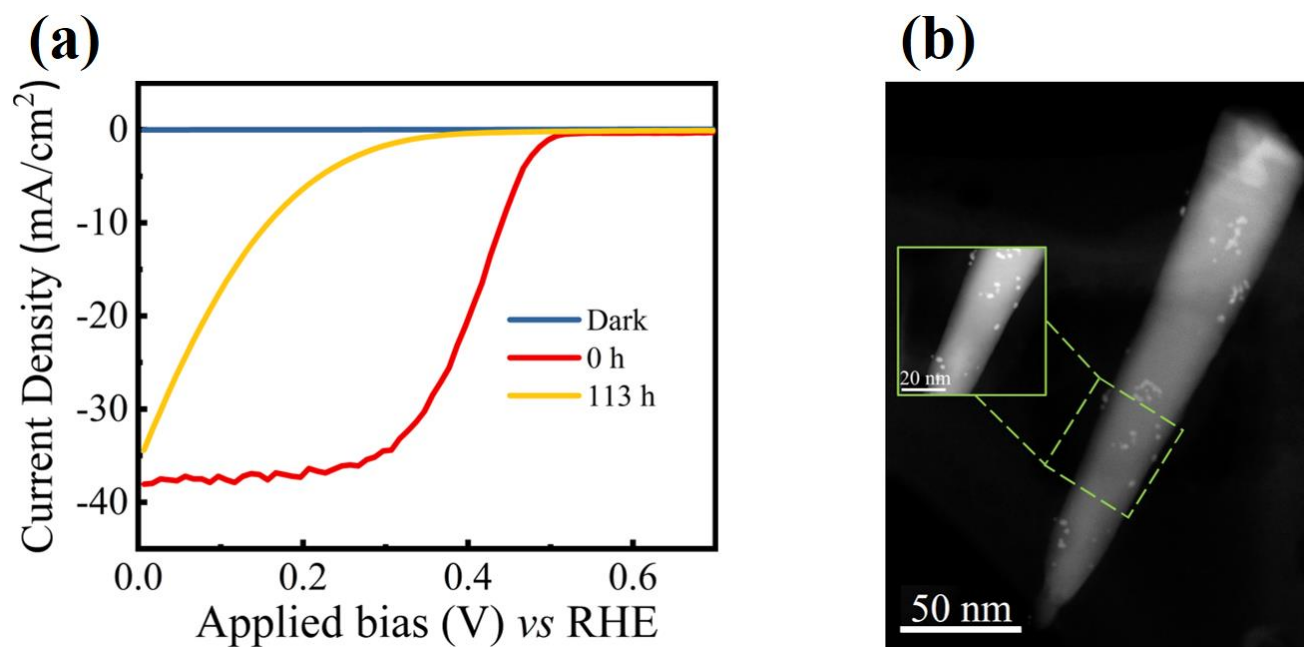

**Figure S3.** (a)  $J$ - $V$  characteristics (from previous publication) of platinized  $n^+$ -GaN nanowires/ $n^+$ - $p$  Si photocathode in 0.5M H<sub>2</sub>SO<sub>4</sub> under AM 1.5G one sun illumination for 0 h (red curve) and 113 h (orange curve) and dark condition (blue curve) <sup>2</sup>. (b) STEM of Pt-decorated  $n^+$ -GaN nanowires/ $n^+$ - $p$  Si photocathode (from previous publication) after 50 h experiment <sup>2</sup>. The Pt nanoparticles are reduced compared to Supp. Info. Figure 1 and the nanowire dimensions remained unchanged.

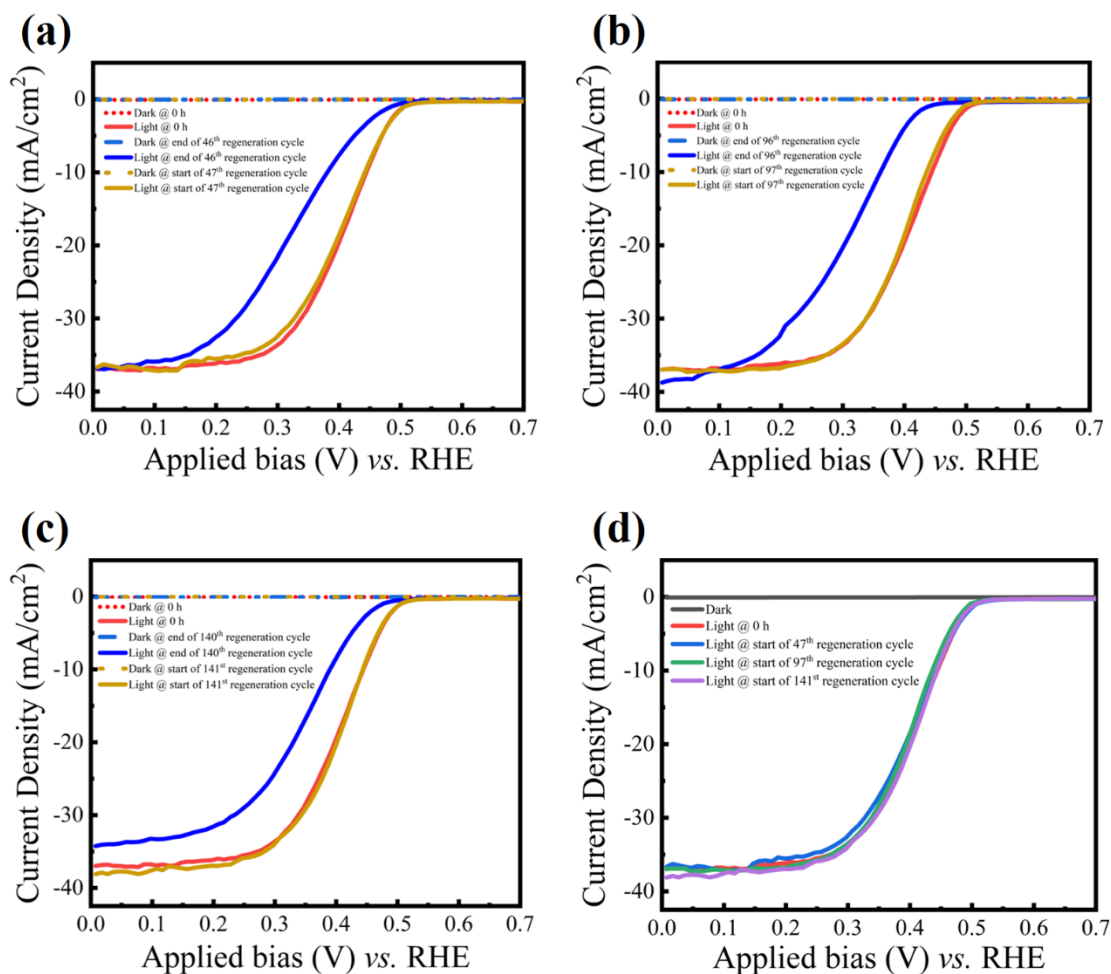

**Figure S4.** Comparison of LSV measured throughout the long-term stability testing under AM 1.5G one-sun illumination and dark. (a) LSV measured at the beginning of the long-term stabilizing testing (i.e., 0 h), at the end of the 46<sup>th</sup> cycle (i.e., 1003 h), and at the beginning of the 47<sup>th</sup> cycle (i.e., 1003 hr, after Pt-redeposition); (b) LSV measured at the beginning of the long-term stabilizing testing (i.e., 0 h), at the end of the 96<sup>th</sup> cycle (i.e., 2022 h), and at the beginning of the 97<sup>th</sup> cycle (i.e., 2022 hr, after Pt-redeposition) and (c) LSV measured at the beginning of the long-term stabilizing testing (i.e., 0 h), at the end of the 140<sup>th</sup> cycle (i.e., 3008 h), and at the beginning of the 141<sup>st</sup> cycle (i.e., 3008 hr, after Pt-redeposition). (d) LSV comparisons between 0 h (red), at the start of 47<sup>th</sup> cycle (blue), 97<sup>th</sup> cycle (green) and 141<sup>st</sup> cycle (pink) under AM 1.5G one-sun illumination in 0.5M H<sub>2</sub>SO<sub>4</sub>.

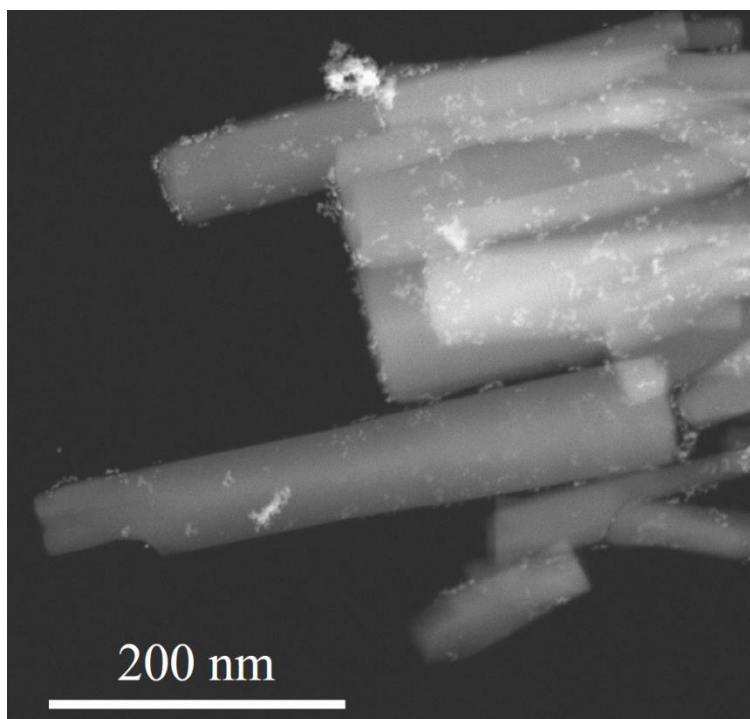

**Figure S5.** STEM image of Pt-decorated  $n^+$ -GaN nanowires/ $n^+$ - $p$  Si photocathode at the end of the 140<sup>th</sup> regeneration cycle. It is seen that the Pt co-catalyst nanoparticles are reduced compared to Supp. Info. Figure 1. No noticeable etching of GaN nanowires was observed.

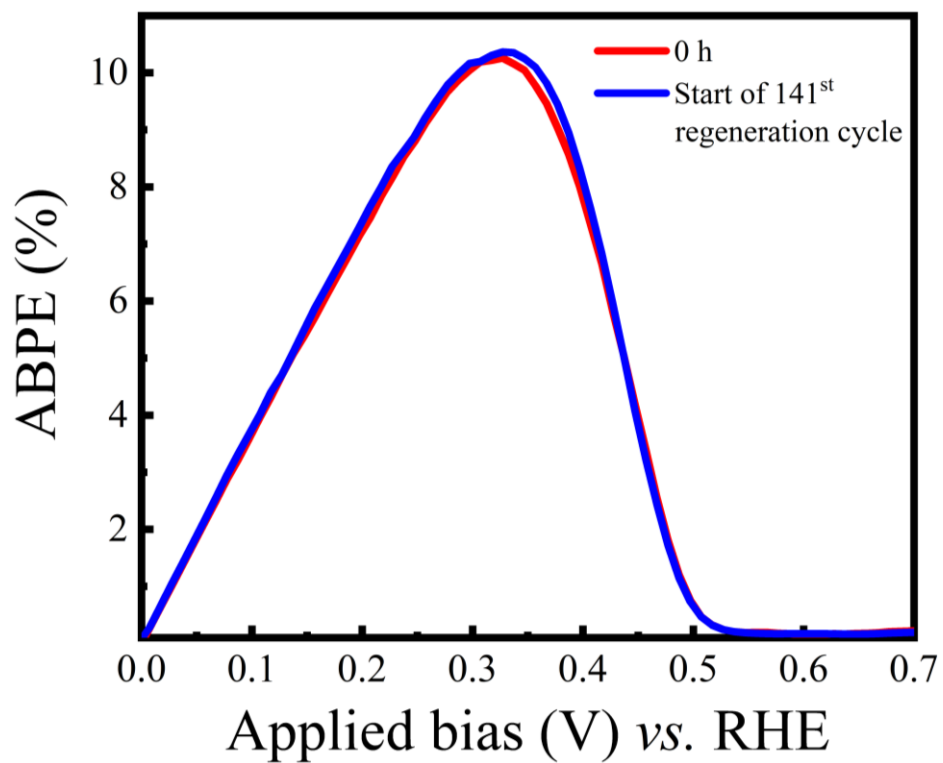

**Figure S6.** ABPE comparison between 0 h (red curve) and at the start of 141<sup>st</sup> regeneration cycle (blue curve). The ABPE for both the curves is ~10%.

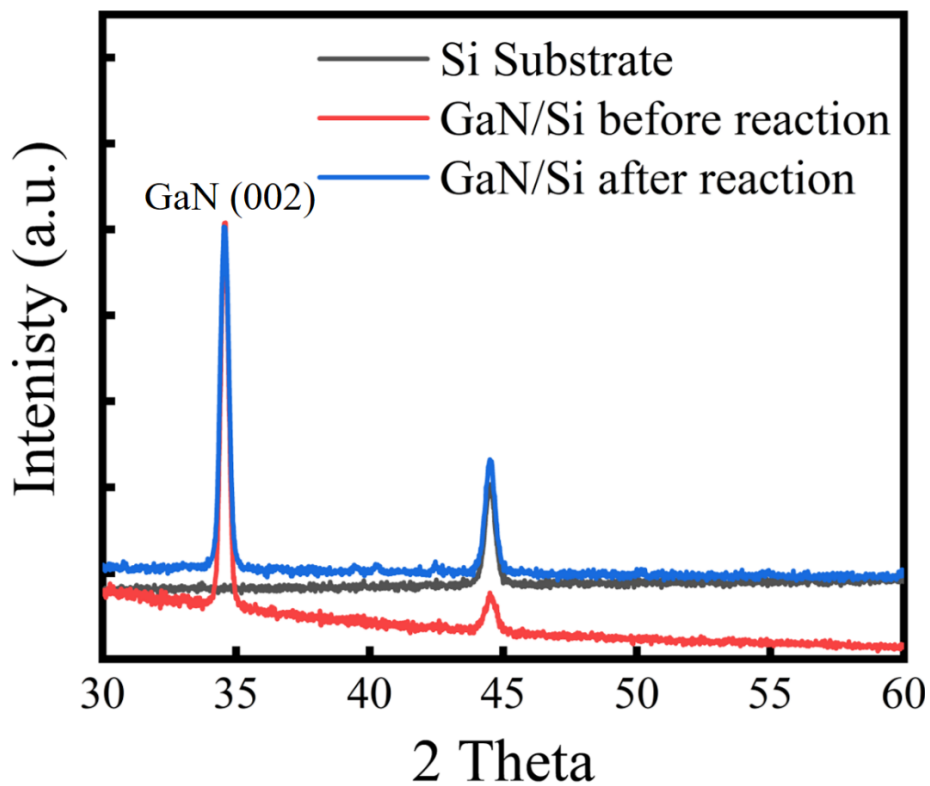

**Figure S7.** X-ray diffraction of GaN/Si photocathode before (red color) and after (blue color) PEC stability reaction. The wurtzite structure of the GaN nanowires was confirmed through the observation of the (002) peak in the XRD spectrum at  $2\theta=34.5^\circ$ . The XRD spectrum for these samples is measured using a Rigaku SmartLab XRD.

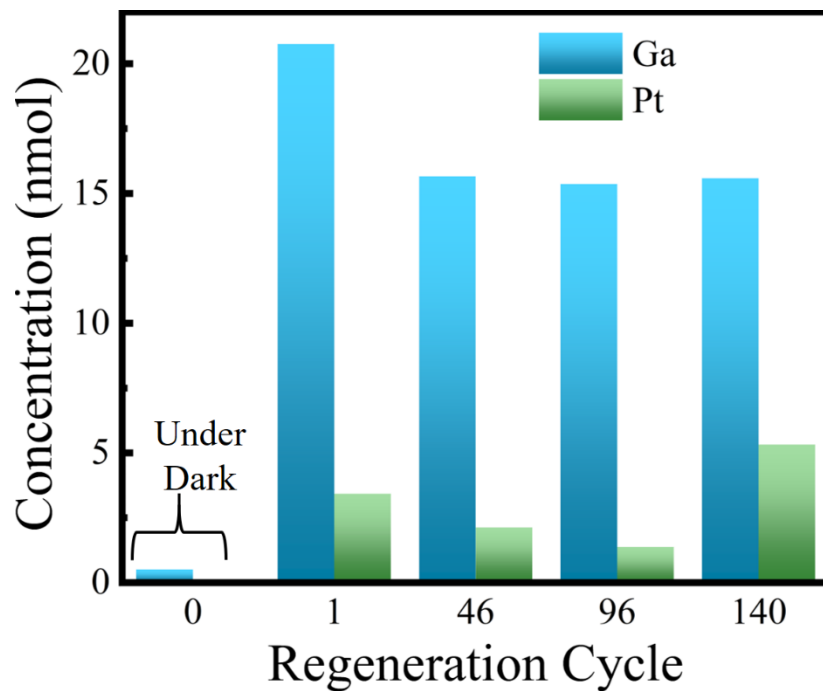

**Figure S8.** ICP-MS measurements of Ga and Pt elements (in nmol) at the end of 24 h dark experiment (shown as “0”), 1<sup>st</sup>, 46<sup>th</sup>, 96<sup>th</sup> and 140<sup>th</sup> regeneration cycle during the long-term stability of Pt/ $n^+$ -GaN nanowires/ $n^+$ - $p$  Si.

**Table S1.** State-of-the-art stability, measured as  $J$  vs.  $t$ , of photocathodes and photoanodes for PEC in three-electrode configuration.

| Materials                                                                       | Electrolyte                         | $J_{ph}$ (mA/cm <sup>2</sup> ) during stability test | ABPE (%)    | Stability                                                       | pH   | Ref |
|---------------------------------------------------------------------------------|-------------------------------------|------------------------------------------------------|-------------|-----------------------------------------------------------------|------|-----|
| MoS <sub>2</sub> /MoO/ <i>n</i> <sup>+</sup> - <i>p</i> Si photocathode         | 0.5M H <sub>2</sub> SO <sub>4</sub> | 15                                                   | 2 (approx.) | 1440 h (at 0 V vs. RHE)                                         | 0    | 7   |
| NiFe/Mo-doped BiVO <sub>4</sub> /Ti/Sn photoanode                               | 1M Borate buffer                    | 2.7                                                  | 3.6         | 1100 h (at 0.6 V vs. RHE)                                       | 7    | 8   |
| NiCrO <sub>x</sub> /TiO <sub>2</sub> / <i>np</i> <sup>+</sup> -Si MW photoanode | 1M KOH                              | 4.6                                                  | 1 (approx.) | 2200 h (at ~1.6 V vs. RHE)                                      | 13.6 | 9   |
| NiMo/NiSi/ <i>n</i> <sup>+</sup> - <i>p</i> Si MW photocathode                  | 1M KOH                              | 9.5                                                  | 10.1        | 288 h (at 0.5 V vs. RHE)                                        | 14   | 10  |
| Pt/TiO <sub>2</sub> /Ti/ <i>n</i> <sup>+</sup> - <i>p</i> Si photocathode       | 0.5M H <sub>2</sub> SO <sub>4</sub> | 17                                                   | 8           | 300 h (at 0.3 V vs. RHE)                                        | 0    | 11  |
| $\alpha$ -Fe <sub>2</sub> O <sub>3</sub> photoanode                             | 1M NaOH                             | 0.95                                                 | 1 (approx.) | 1000 h (at 1.45 V vs. RHE)                                      | 14   | 12  |
| Pt/TiO <sub>2</sub> /Ti/ <i>n</i> <sup>+</sup> - <i>p</i> Si photocathode       | 1M HClO <sub>4</sub>                | 22                                                   | NA          | 720 h (at 0.3 V vs. RHE); incident photon ( $\lambda > 635$ nm) | 0    | 13  |

|                                                                    |                                     |      |      |                                                                  |    |           |
|--------------------------------------------------------------------|-------------------------------------|------|------|------------------------------------------------------------------|----|-----------|
| Pt/TiO <sub>2</sub> /Si MOS photocathode                           | 1M HClO <sub>4</sub>                | 25   | NA   | 1900 h (at 0.4 V vs. RHE); incident photon ( $\lambda > 635$ nm) | 0  | 14        |
| NiO <sub>x</sub> /np <sup>+</sup> Si photoanode                    | 1M KOH                              | 32   | 2.3  | 1200 h (at 1.73 V vs. RHE)                                       | 14 | 15        |
| Pt/CdS/CuGa <sub>3</sub> Se <sub>5</sub> /(Ag,Cu)GaSe <sub>2</sub> | 0.1M Buffer solution                | 8.79 | NA   | 240 h (at 0 V vs. RHE)                                           | 7  | 16        |
| Pt/n <sup>+</sup> -GaN nanowires/n <sup>+</sup> -p Si photocathode | 0.5M H <sub>2</sub> SO <sub>4</sub> | 38   | 11.9 | 3000 h (at 0 V vs. RHE)                                          | 0  | This work |

Note: Mo/np<sup>+</sup>-Si photoanode showed long-term stability of ~ 4500 h (at 0 V vs. Pt)<sup>17</sup>. But the stability measurements were done under uncalibrated light source in HI solution, which is not water splitting.



**Table S2.** Summary of all regeneration cycles showing  $V_{on}$ , photocurrent density  $J_{ph}$  and dark current density  $J_d$  at the start and end of each cycle.

| Regeneration Cycle | Start of cycle (h) | End of cycle (h) | $V_{on}$ (V vs. RHE) |      | $J_{ph}$ at 0 V vs. RHE (mA/cm <sup>2</sup> ) |     | $J_d$ at 0 V vs. RHE (mA/cm <sup>2</sup> ) |      |
|--------------------|--------------------|------------------|----------------------|------|-----------------------------------------------|-----|--------------------------------------------|------|
|                    |                    |                  | Start                | End  | Start                                         | End | Start                                      | End  |
| 1                  | 0                  | 23               | 0.54                 | 0.5  | 37                                            | 38  | 0.03                                       | 0.03 |
| 2                  | 23                 | 46               | 0.52                 | 0.49 | 38                                            | 39  | 0.03                                       | 0.03 |
| 3                  | 46                 | 70               | 0.53                 | 0.5  | 38                                            | 37  | 0.03                                       | 0.03 |
| 4                  | 70                 | 93               | 0.51                 | 0.49 | 37                                            | 35  | 0.03                                       | 0.03 |
| 5                  | 93                 | 116              | 0.51                 | 0.48 | 37                                            | 35  | 0.03                                       | 0.03 |
| 6                  | 116                | 139              | 0.51                 | 0.49 | 38                                            | 37  | 0.03                                       | 0.03 |
| 7                  | 139                | 164              | 0.52                 | 0.48 | 38                                            | 37  | 0.03                                       | 0.03 |
| 8                  | 164                | 187              | 0.53                 | 0.47 | 38                                            | 38  | 0.03                                       | 0.03 |
| 9                  | 187                | 210              | 0.51                 | 0.49 | 38                                            | 38  | 0.03                                       | 0.03 |
| 10                 | 210                | 232              | 0.53                 | 0.44 | 37                                            | 39  | 0.03                                       | 0.03 |
| 11                 | 232                | 259              | 0.51                 | 0.45 | 38                                            | 39  | 0.03                                       | 0.03 |
| 12                 | 259                | 284              | 0.5                  | 0.46 | 39                                            | 39  | 0.03                                       | 0.03 |
| 13                 | 284                | 308              | 0.53                 | 0.44 | 38                                            | 36  | 0.03                                       | 0.03 |
| 14                 | 308                | 332              | 0.52                 | 0.43 | 38                                            | 39  | 0.03                                       | 0.03 |
| 15                 | 332                | 345              | 0.54                 | 0.43 | 39                                            | 40  | 0.03                                       | 0.03 |
| 16                 | 345                | 357              | 0.5                  | 0.42 | 39                                            | 36  | 0.03                                       | 0.03 |

|    |     |     |      |      |    |    |      |      |
|----|-----|-----|------|------|----|----|------|------|
| 17 | 357 | 386 | 0.51 | 0.4  | 38 | 37 | 0.03 | 0.03 |
| 18 | 386 | 400 | 0.51 | 0.48 | 37 | 34 | 0.03 | 0.03 |
| 19 | 400 | 417 | 0.51 | 0.49 | 38 | 38 | 0.03 | 0.03 |
| 20 | 417 | 441 | 0.52 | 0.48 | 38 | 37 | 0.03 | 0.03 |
| 21 | 441 | 465 | 0.53 | 0.47 | 37 | 38 | 0.03 | 0.03 |
| 22 | 465 | 490 | 0.51 | 0.49 | 38 | 36 | 0.03 | 0.03 |
| 23 | 490 | 514 | 0.53 | 0.44 | 37 | 37 | 0.03 | 0.03 |
| 24 | 514 | 539 | 0.52 | 0.48 | 39 | 38 | 0.03 | 0.03 |
| 25 | 539 | 562 | 0.54 | 0.5  | 38 | 39 | 0.03 | 0.03 |
| 26 | 562 | 583 | 0.52 | 0.49 | 37 | 38 | 0.03 | 0.03 |
| 27 | 583 | 607 | 0.53 | 0.47 | 38 | 38 | 0.03 | 0.03 |
| 28 | 607 | 628 | 0.52 | 0.48 | 38 | 39 | 0.03 | 0.03 |
| 29 | 628 | 650 | 0.53 | 0.47 | 38 | 39 | 0.03 | 0.03 |
| 30 | 650 | 674 | 0.51 | 0.49 | 40 | 40 | 0.03 | 0.03 |
| 31 | 674 | 690 | 0.53 | 0.44 | 38 | 37 | 0.03 | 0.03 |
| 32 | 690 | 713 | 0.52 | 0.48 | 38 | 37 | 0.03 | 0.03 |
| 33 | 713 | 738 | 0.51 | 0.49 | 39 | 40 | 0.03 | 0.03 |
| 34 | 738 | 762 | 0.53 | 0.44 | 38 | 37 | 0.03 | 0.03 |
| 35 | 762 | 783 | 0.51 | 0.45 | 38 | 36 | 0.03 | 0.03 |
| 36 | 783 | 807 | 0.5  | 0.46 | 38 | 34 | 0.03 | 0.03 |
| 37 | 807 | 823 | 0.53 | 0.44 | 37 | 34 | 0.03 | 0.03 |
| 38 | 823 | 848 | 0.54 | 0.5  | 39 | 38 | 0.03 | 0.03 |
| 39 | 848 | 870 | 0.52 | 0.49 | 38 | 38 | 0.03 | 0.03 |

|    |      |      |      |      |    |    |      |      |
|----|------|------|------|------|----|----|------|------|
| 40 | 870  | 892  | 0.53 | 0.5  | 38 | 41 | 0.03 | 0.03 |
| 41 | 892  | 917  | 0.51 | 0.49 | 40 | 40 | 0.03 | 0.03 |
| 42 | 917  | 938  | 0.51 | 0.48 | 38 | 39 | 0.03 | 0.03 |
| 43 | 938  | 962  | 0.51 | 0.49 | 38 | 39 | 0.03 | 0.03 |
| 44 | 962  | 974  | 0.52 | 0.48 | 39 | 40 | 0.03 | 0.03 |
| 45 | 974  | 985  | 0.53 | 0.47 | 38 | 39 | 0.03 | 0.03 |
| 46 | 985  | 1003 | 0.51 | 0.49 | 38 | 40 | 0.03 | 0.03 |
| 47 | 1003 | 1024 | 0.53 | 0.44 | 39 | 38 | 0.03 | 0.03 |
| 48 | 1024 | 1046 | 0.51 | 0.45 | 38 | 39 | 0.03 | 0.03 |
| 49 | 1046 | 1075 | 0.5  | 0.46 | 37 | 38 | 0.03 | 0.03 |
| 50 | 1075 | 1095 | 0.54 | 0.43 | 38 | 38 | 0.03 | 0.03 |
| 51 | 1095 | 1115 | 0.51 | 0.48 | 38 | 39 | 0.03 | 0.03 |
| 52 | 1115 | 1139 | 0.51 | 0.49 | 38 | 37 | 0.03 | 0.03 |
| 53 | 1139 | 1159 | 0.52 | 0.48 | 38 | 33 | 0.03 | 0.03 |
| 54 | 1159 | 1172 | 0.53 | 0.47 | 38 | 34 | 0.03 | 0.03 |
| 55 | 1172 | 1197 | 0.51 | 0.49 | 37 | 42 | 0.03 | 0.03 |
| 56 | 1197 | 1222 | 0.53 | 0.44 | 38 | 40 | 0.03 | 0.03 |
| 57 | 1222 | 1242 | 0.51 | 0.45 | 39 | 38 | 0.03 | 0.03 |
| 58 | 1242 | 1263 | 0.5  | 0.46 | 38 | 33 | 0.03 | 0.03 |
| 59 | 1263 | 1277 | 0.53 | 0.44 | 37 | 39 | 0.03 | 0.03 |
| 60 | 1277 | 1285 | 0.51 | 0.45 | 38 | 37 | 0.03 | 0.03 |
| 61 | 1285 | 1308 | 0.54 | 0.48 | 38 | 40 | 0.03 | 0.03 |
| 62 | 1308 | 1326 | 0.52 | 0.48 | 40 | 38 | 0.03 | 0.03 |

|    |      |      |      |      |    |    |      |      |
|----|------|------|------|------|----|----|------|------|
| 63 | 1326 | 1353 | 0.53 | 0.47 | 38 | 37 | 0.03 | 0.03 |
| 64 | 1353 | 1379 | 0.54 | 0.5  | 38 | 39 | 0.03 | 0.03 |
| 65 | 1379 | 1399 | 0.52 | 0.49 | 38 | 41 | 0.03 | 0.03 |
| 66 | 1399 | 1423 | 0.53 | 0.5  | 38 | 39 | 0.03 | 0.03 |
| 67 | 1423 | 1440 | 0.51 | 0.49 | 37 | 41 | 0.03 | 0.03 |
| 68 | 1440 | 1464 | 0.51 | 0.48 | 38 | 33 | 0.03 | 0.03 |
| 69 | 1464 | 1480 | 0.51 | 0.49 | 38 | 35 | 0.03 | 0.03 |
| 70 | 1480 | 1504 | 0.52 | 0.48 | 38 | 33 | 0.03 | 0.03 |
| 71 | 1504 | 1514 | 0.53 | 0.47 | 38 | 40 | 0.03 | 0.03 |
| 72 | 1514 | 1531 | 0.51 | 0.49 | 38 | 38 | 0.03 | 0.03 |
| 73 | 1531 | 1556 | 0.53 | 0.44 | 37 | 32 | 0.03 | 0.03 |
| 74 | 1556 | 1580 | 0.51 | 0.45 | 38 | 38 | 0.03 | 0.03 |
| 75 | 1580 | 1604 | 0.53 | 0.44 | 38 | 39 | 0.03 | 0.03 |
| 76 | 1604 | 1629 | 0.51 | 0.45 | 38 | 32 | 0.03 | 0.03 |
| 77 | 1629 | 1650 | 0.54 | 0.48 | 39 | 40 | 0.03 | 0.03 |
| 78 | 1650 | 1674 | 0.52 | 0.48 | 38 | 36 | 0.03 | 0.03 |
| 79 | 1674 | 1690 | 0.53 | 0.47 | 38 | 39 | 0.03 | 0.03 |
| 80 | 1690 | 1714 | 0.54 | 0.5  | 38 | 37 | 0.03 | 0.03 |
| 81 | 1714 | 1724 | 0.52 | 0.49 | 39 | 33 | 0.03 | 0.03 |
| 82 | 1724 | 1740 | 0.53 | 0.5  | 38 | 33 | 0.03 | 0.03 |
| 83 | 1740 | 1754 | 0.52 | 0.43 | 38 | 39 | 0.03 | 0.03 |
| 84 | 1754 | 1778 | 0.54 | 0.43 | 38 | 37 | 0.03 | 0.03 |
| 85 | 1778 | 1802 | 0.51 | 0.48 | 38 | 39 | 0.03 | 0.03 |

|     |      |      |      |      |    |    |      |      |
|-----|------|------|------|------|----|----|------|------|
| 86  | 1802 | 1826 | 0.51 | 0.49 | 38 | 37 | 0.03 | 0.03 |
| 87  | 1826 | 1836 | 0.52 | 0.48 | 38 | 35 | 0.03 | 0.03 |
| 88  | 1836 | 1851 | 0.51 | 0.48 | 38 | 33 | 0.03 | 0.03 |
| 89  | 1851 | 1871 | 0.51 | 0.49 | 39 | 40 | 0.03 | 0.03 |
| 90  | 1871 | 1891 | 0.52 | 0.48 | 38 | 38 | 0.03 | 0.03 |
| 91  | 1891 | 1908 | 0.53 | 0.47 | 39 | 38 | 0.03 | 0.03 |
| 92  | 1908 | 1922 | 0.54 | 0.5  | 38 | 38 | 0.03 | 0.03 |
| 93  | 1922 | 1950 | 0.52 | 0.49 | 38 | 39 | 0.03 | 0.03 |
| 94  | 1950 | 1974 | 0.53 | 0.5  | 39 | 36 | 0.03 | 0.03 |
| 95  | 1974 | 1998 | 0.51 | 0.49 | 38 | 39 | 0.03 | 0.03 |
| 96  | 1998 | 2022 | 0.51 | 0.48 | 37 | 39 | 0.03 | 0.03 |
| 97  | 2022 | 2047 | 0.51 | 0.49 | 38 | 39 | 0.03 | 0.03 |
| 98  | 2047 | 2061 | 0.52 | 0.48 | 39 | 37 | 0.03 | 0.03 |
| 99  | 2061 | 2075 | 0.53 | 0.47 | 38 | 38 | 0.03 | 0.03 |
| 100 | 2075 | 2090 | 0.54 | 0.5  | 37 | 38 | 0.03 | 0.03 |
| 101 | 2090 | 2114 | 0.52 | 0.49 | 39 | 40 | 0.03 | 0.03 |
| 102 | 2114 | 2134 | 0.53 | 0.5  | 41 | 38 | 0.03 | 0.03 |
| 103 | 2134 | 2150 | 0.52 | 0.43 | 38 | 38 | 0.03 | 0.03 |
| 104 | 2150 | 2174 | 0.54 | 0.43 | 39 | 36 | 0.03 | 0.03 |
| 105 | 2174 | 2190 | 0.51 | 0.48 | 38 | 38 | 0.03 | 0.03 |
| 106 | 2190 | 2214 | 0.52 | 0.43 | 38 | 36 | 0.03 | 0.03 |
| 107 | 2214 | 2230 | 0.51 | 0.49 | 39 | 38 | 0.03 | 0.03 |
| 108 | 2230 | 2254 | 0.51 | 0.48 | 38 | 37 | 0.03 | 0.03 |

|     |      |      |      |      |    |    |      |      |
|-----|------|------|------|------|----|----|------|------|
| 109 | 2254 | 2270 | 0.51 | 0.49 | 39 | 36 | 0.03 | 0.03 |
| 110 | 2270 | 2294 | 0.52 | 0.48 | 38 | 34 | 0.03 | 0.03 |
| 111 | 2294 | 2310 | 0.53 | 0.47 | 38 | 36 | 0.03 | 0.03 |
| 112 | 2310 | 2334 | 0.51 | 0.49 | 38 | 35 | 0.03 | 0.03 |
| 113 | 2334 | 2358 | 0.53 | 0.44 | 39 | 33 | 0.03 | 0.03 |
| 114 | 2358 | 2382 | 0.51 | 0.45 | 38 | 39 | 0.03 | 0.03 |
| 115 | 2382 | 2406 | 0.5  | 0.46 | 38 | 37 | 0.03 | 0.03 |
| 116 | 2406 | 2430 | 0.53 | 0.44 | 39 | 37 | 0.03 | 0.03 |
| 117 | 2430 | 2454 | 0.52 | 0.43 | 37 | 35 | 0.03 | 0.03 |
| 118 | 2454 | 2478 | 0.54 | 0.43 | 38 | 37 | 0.03 | 0.03 |
| 119 | 2478 | 2502 | 0.54 | 0.5  | 39 | 38 | 0.03 | 0.03 |
| 120 | 2502 | 2526 | 0.52 | 0.49 | 38 | 36 | 0.03 | 0.03 |
| 121 | 2526 | 2550 | 0.53 | 0.5  | 39 | 38 | 0.03 | 0.03 |
| 122 | 2550 | 2574 | 0.51 | 0.49 | 38 | 38 | 0.03 | 0.03 |
| 123 | 2574 | 2599 | 0.51 | 0.48 | 38 | 35 | 0.03 | 0.03 |
| 124 | 2599 | 2623 | 0.51 | 0.49 | 39 | 40 | 0.03 | 0.03 |
| 125 | 2623 | 2647 | 0.52 | 0.48 | 38 | 38 | 0.03 | 0.03 |
| 126 | 2647 | 2671 | 0.53 | 0.47 | 39 | 37 | 0.03 | 0.03 |
| 127 | 2671 | 2695 | 0.51 | 0.49 | 38 | 33 | 0.03 | 0.03 |
| 128 | 2695 | 2720 | 0.53 | 0.44 | 39 | 39 | 0.03 | 0.03 |
| 129 | 2720 | 2744 | 0.51 | 0.45 | 38 | 39 | 0.03 | 0.03 |
| 130 | 2744 | 2768 | 0.5  | 0.46 | 39 | 37 | 0.03 | 0.03 |
| 131 | 2768 | 2793 | 0.51 | 0.45 | 38 | 36 | 0.03 | 0.03 |

|     |      |      |      |      |    |    |      |      |
|-----|------|------|------|------|----|----|------|------|
| 132 | 2793 | 2817 | 0.54 | 0.48 | 38 | 40 | 0.03 | 0.03 |
| 133 | 2817 | 2841 | 0.52 | 0.48 | 39 | 39 | 0.03 | 0.03 |
| 134 | 2841 | 2865 | 0.53 | 0.47 | 37 | 37 | 0.03 | 0.03 |
| 135 | 2865 | 2889 | 0.53 | 0.44 | 38 | 35 | 0.03 | 0.03 |
| 136 | 2889 | 2913 | 0.52 | 0.43 | 37 | 40 | 0.03 | 0.03 |
| 137 | 2913 | 2937 | 0.54 | 0.43 | 39 | 39 | 0.03 | 0.03 |
| 138 | 2937 | 2961 | 0.51 | 0.48 | 38 | 37 | 0.03 | 0.03 |
| 139 | 2961 | 2984 | 0.51 | 0.49 | 39 | 38 | 0.03 | 0.03 |
| 140 | 2984 | 3008 | 0.52 | 0.48 | 38 | 35 | 0.03 | 0.03 |
| 141 | 3008 | 3024 | 0.54 | 0.48 | 38 | 37 | 0.03 | 0.03 |

## References

1. M. G. Kibria, R. Qiao, W. Yang, I. Boukahil, X. Kong, F. A. Chowdhury, M. L. Trudeau, W. Ji, H. Guo, F. J. Himpsel, L. Vayssieres and Z. Mi, *Adv. Mater.*, 2016, **28**, 8388-8397.
2. S. Vanka, E. Arca, S. Cheng, K. Sun, G. A. Botton, G. Teeter and Z. Mi, *Nano Lett.*, 2018, **18**, 6530-6537.
3. B. Zhou, X. Kong, S. Vanka, S. Chu, P. Ghamari, Y. Wang, N. Pant, I. Shih, H. Guo and Z. Mi, *Nat. Commun.*, 2018, **9**.
4. B. Zhou, X. Kong, S. Vanka, S. Cheng, N. Pant, S. Chu, P. Ghamari, Y. Wang, G. Botton, H. Cuo and Z. Mi, *Energ. Environ. Sci.*, 2019, DOI: 10.1039/c9ee01339c.
5. Z. Chen, T. F. Jaramillo, T. G. Deutsch, A. Kleiman-Shwarsstein, A. J. Forman, N. Gaillard, R. Garland, K. Takanabe, C. Heske, M. Sunkara, E. W. McFarland, K. Domen, E. L. Miller, J. A. Turner and H. N. Dinh, *J. Mater. Res.*, 2011, **25**, 3-16.
6. B. AlOtaibi, H. P. Nguyen, S. Zhao, M. G. Kibria, S. Fan and Z. Mi, *Nano Lett.*, 2013, **13**, 4356-4361.
7. L. A. King, T. R. Hellstern, J. Park, R. Sinclair and T. F. Jaramillo, *ACS Appl. Mater. Interfaces*, 2017, **9**, 36792-36798.
8. Y. Kuang, Q. Jia, G. Ma, T. Hisatomi, T. Minegishi, H. Nishiyama, M. Nakabayashi, N. Shibata, T. Yamada, A. Kudo and K. Domen, *Nat. Energ.*, 2016, **2**, 16191.
9. M. R. Shaner, S. Hu, K. Sun and N. S. Lewis, *Energ. Environ. Sci.*, 2015, **8**, 203-207.
10. W. Vijeelaar, R. M. Tiggelaar, H. Gardeniers and J. Huskens, *ACS Energ. Lett.*, 2018, **3**, 1086-1092.
11. C. Ros, T. Andreu, M. D. Hernandez-Alonso, G. Penelas-Perez, J. Arbiol and J. R. Morante, *ACS Appl. Mater. Interfaces*, 2017, DOI: 10.1021/acsami.7b02996.



12. P. Dias, A. Vilanova, T. Lopes, L. Andrade and A. Mendes, *Nano Energ.*, 2016, **23**, 70-79.
13. B. Seger, D. S. Tilley, T. Pedersen, P. C. K. Vesborg, O. Hansen, M. Grätzel and I. Chorkendorff, *RSC Adv.*, 2013, **3**, 25902.
14. D. Bae, B. Seger, O. Hansen, P. C. K. Vesborg and I. Chorkendorff, *Chemelectrochem*, 2019, **6**, 106-109.
15. K. Sun, M. T. McDowell, A. C. Nielander, S. Hu, M. R. Shaner, F. Yang, B. S. Brunshwig and N. S. Lewis, *J. Phys. Chem. Lett.*, 2015, **6**, 592-598.
16. L. Zhang, T. Minegishi, M. Nakabayashi, Y. Suzuki, K. Seki, N. Shibata, J. Kubota and K. Domen, *Chem. Sci.*, 2015, **6**, 894-901.
17. Y. Nakato, Y. Iwakabe, M. Hiramoto and H. Tsubomura, *J. Electrochem. Soc.*, 1986, **133**, 900-904.
